# Supplementary material
Source: publisher site journal article supplement (https://www.dovepress.com/article/462266)

Figure S: (1) Heatmap of hierarchical clustering analysis for group WT vs Model. (2) Heatmap of hierarchical clustering analysis for group Model vs CRD. The horizontal axis in the figure represents different experimental groups, the vertical axis represents the differential metabolites compared in the group, the color blocks at different positions represent the relative expression levels of corresponding metabolites, the red color indicates high expression of the substance in the group, and the blue color indicates low expression of the substance in the group.

Figure S1: Heatmap of hierarchical clustering analysis for group WT vs Model

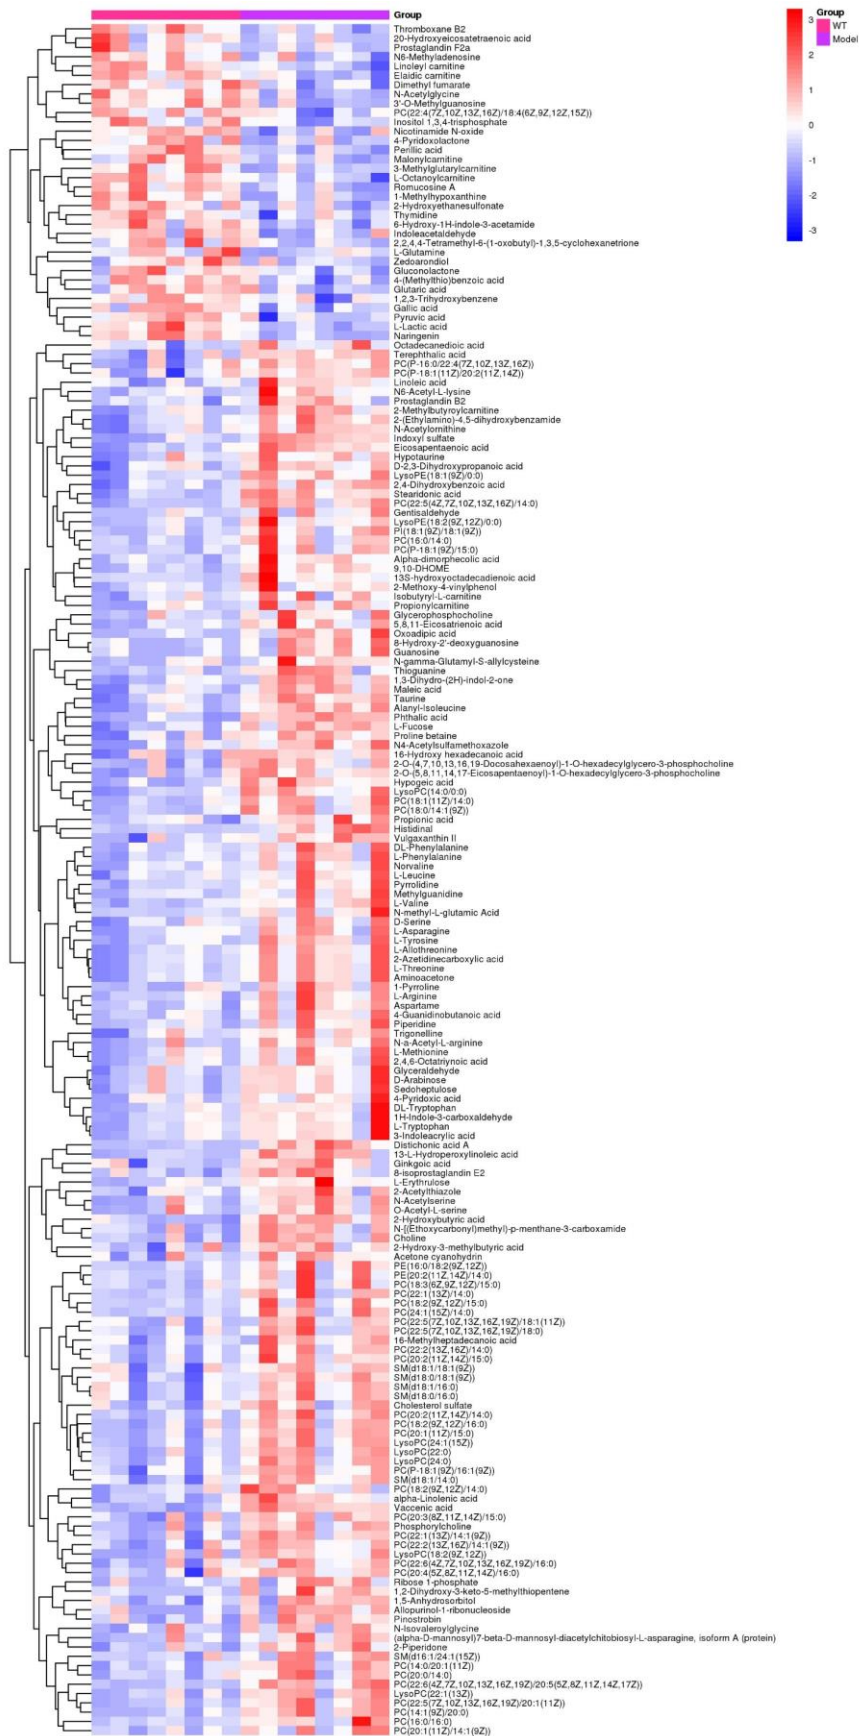

Figure S2: Heatmap of hierarchical clustering analysis for group Model vs CRD

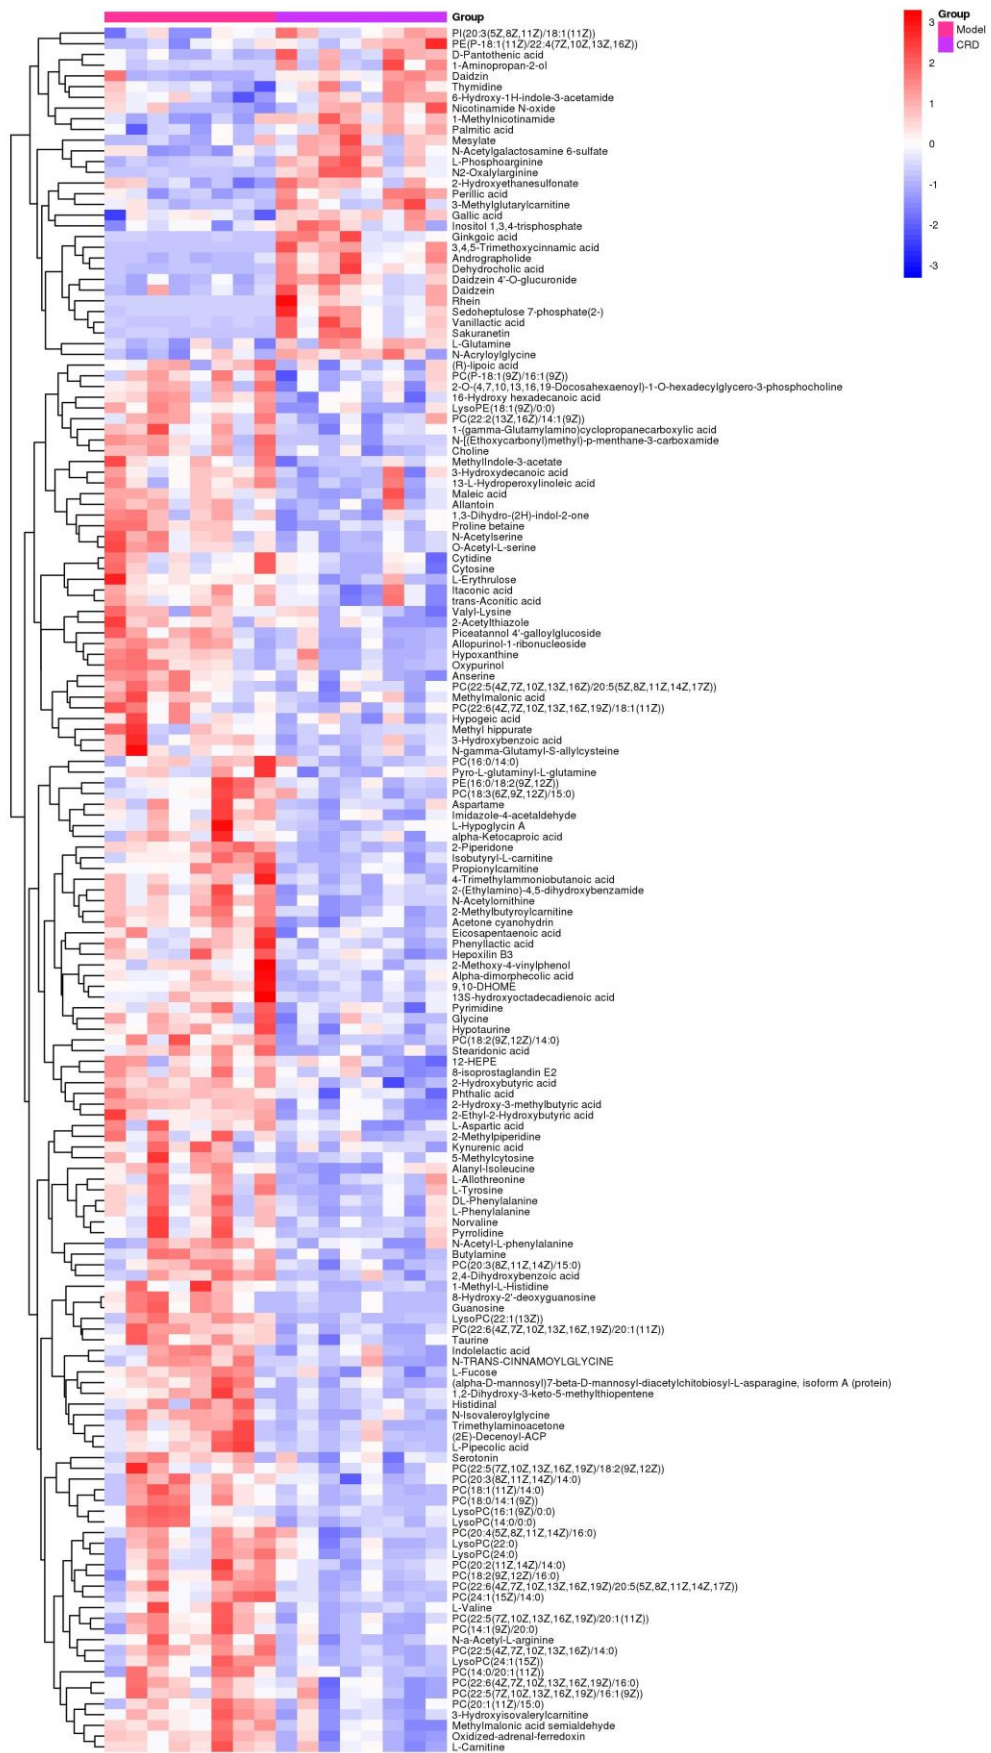

Supplement: Supplementary file 1 [file get_supplementary_file.php]
